# Supplementary material for: CuO nanoclusters coated with mesoporous SiO2 as highly active and stable catalysts for olefin epoxidation
Source: Royal Society of Chemistry journal article supplement (doi:10.1039/c0jm04568c), 2011-01-01
Supplement: c0jm04568c.pdf [file c0jm04568c.pdf]

## Electronic Supplementary Information (ESI)

### CuO nanoclusters coated with mesoporous SiO<sub>2</sub> as highly active and stable catalyst for olefin epoxidation

Chaoqiu Chen,<sup>ab</sup> Jin Qu,<sup>ab</sup> Changyan Cao,<sup>c</sup> Fang Niu<sup>ab</sup> and Weiguo Song<sup>\*a</sup>

<sup>a</sup>Beijing National Laboratory for Molecular Sciences (BNLMS), Institute of Chemistry, Chinese Academy of Sciences, Beijing 100190, P. R. China. Tel & Fax: (+86)10-62557908, E-mail: wsong@iccas.ac.cn

<sup>b</sup>Also in the Graduate School of Chinese Academy of Sciences, Beijing 100049, P. R. China

<sup>c</sup>Also in the School of Materials Science and Engineering, Harbin Institute of Technology, Harbin, 150001, P. R. China

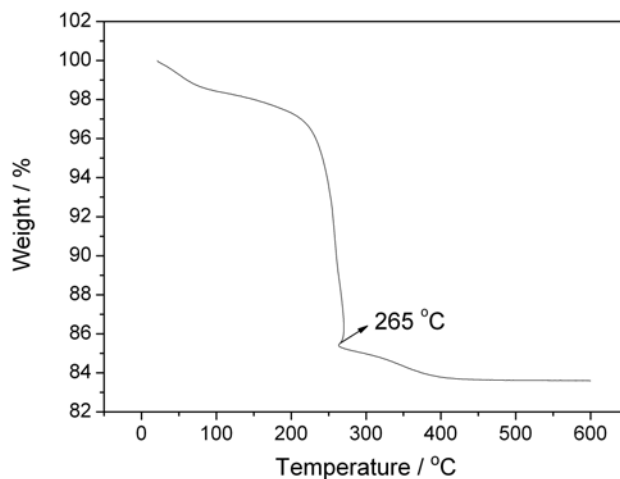

**Fig. S1** TG profile of CuO CNCs. The TG plot shows three major weight loss regimes, the two areas before 250 °C can be mainly assigned to the loss of adsorbed and hydrated water in the CuO CNCs. The final one starting around 265 °C is corresponded to the degradation of PVP, resulting in 1.8% weight loss.<sup>1</sup>

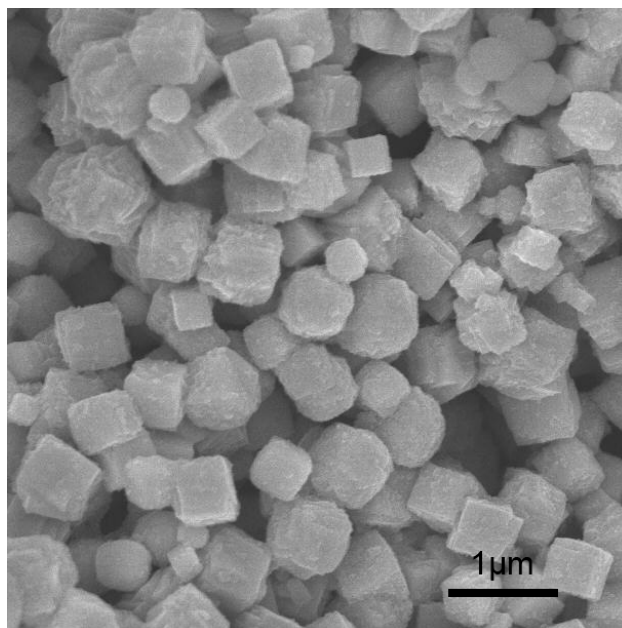

**Fig. S2** SEM image of sample obtained at the same reaction conditions without the addition of surfactant PVP.

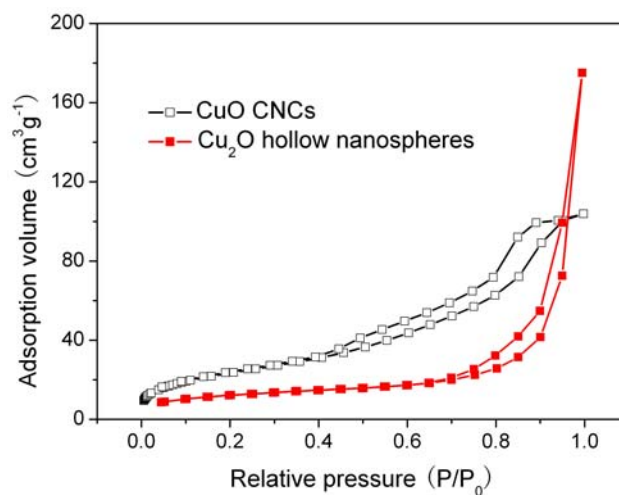

**Fig. S3**  $\text{N}_2$  adsorption-desorption isotherms of the CuO CNCs and  $\text{Cu}_2\text{O}$  hollow nanospheres.

Supplementary Material (ESI) for Journal of Materials Chemistry

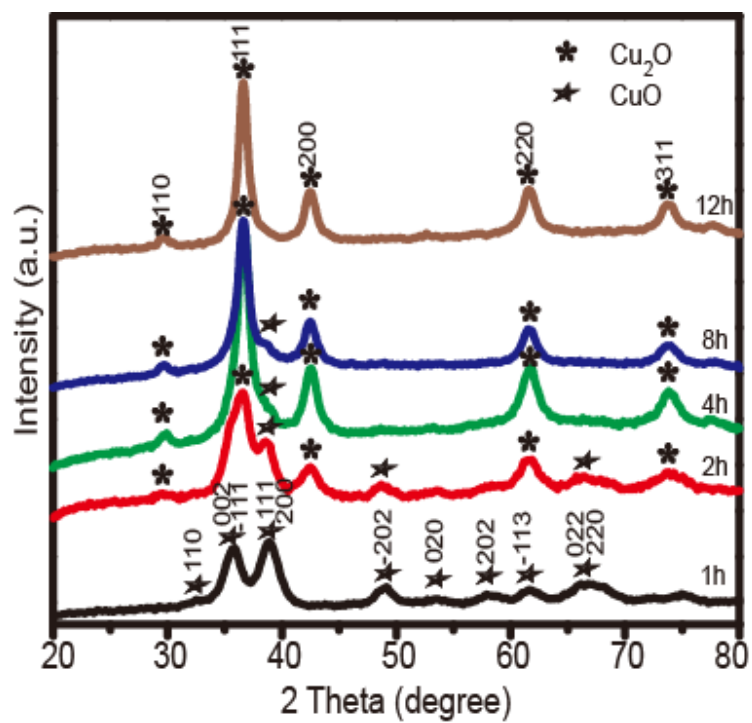

**Fig. S4** X-ray diffraction patterns of samples obtained with different reaction times.

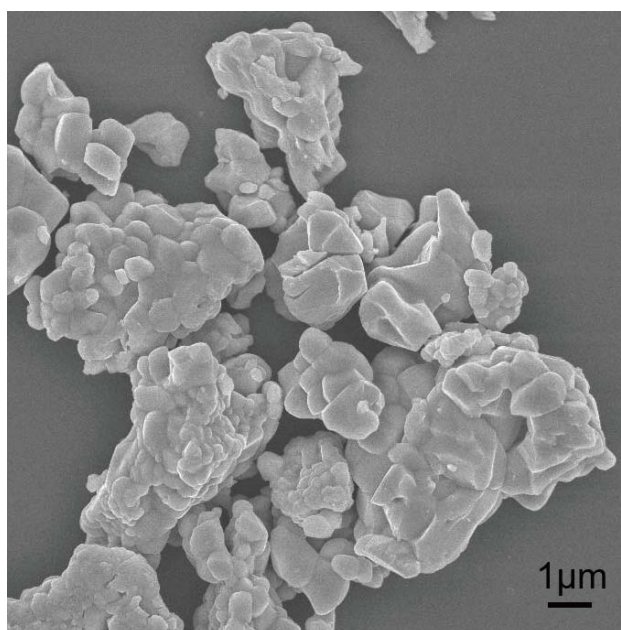

**Fig. S5** SEM image of commercial available CuO.

Supplementary Material (ESI) for Journal of Materials Chemistry

This journal is (c) The Royal Society of Chemistry 2011

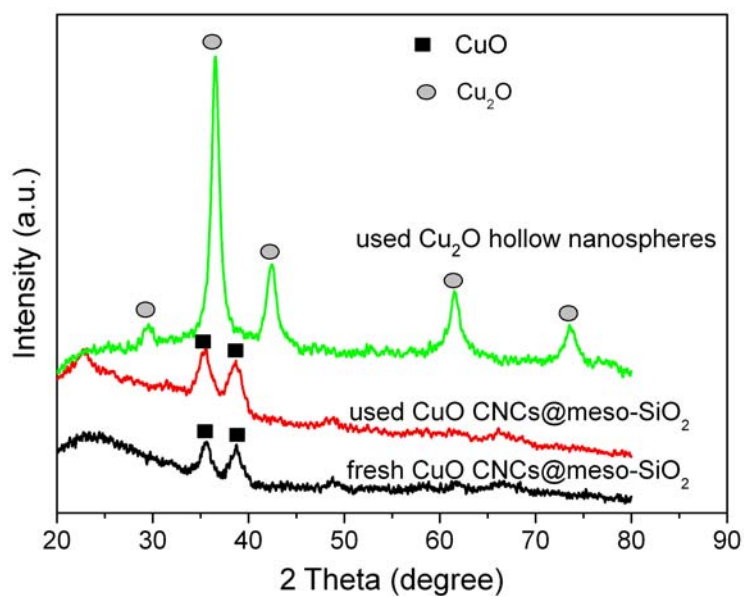

**Fig. S6** X-ray diffraction patterns of fresh, used CuO CNCs@meso-SiO<sub>2</sub> nanocomposite and used Cu<sub>2</sub>O hollow nanospheres.

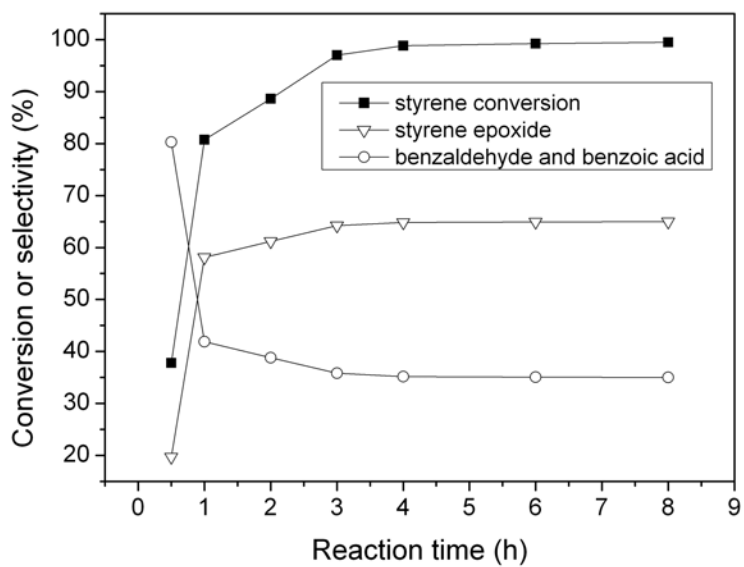

**Fig. S7** The styrene epoxidation over CuO CNCs@meso-SiO<sub>2</sub> nanocomposite as a function of reaction time. Conditions: 1 mmol styrene, 5 mmol TBHP, 10 mg catalyst, stirred in 10 mL of acetonitrile under reflux (70°C).

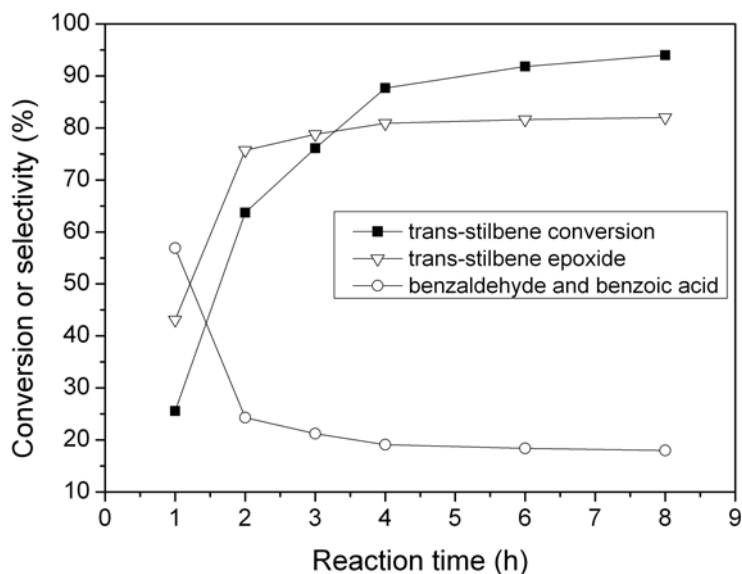

**Fig. S8** The trans-stilbene epoxidation over CuO CNCs@meso-SiO<sub>2</sub> nanocomposite as a function of reaction time. Conditions: 1 mmol trans-stilbene, 5 mmol TBHP, 10 mg catalyst, stirred in 10 mL of acetonitrile under reflux (70°C).

**Table S1** Influence of reaction temperature on alkene epoxide selectivities over CuO CNCs@meso-SiO<sub>2</sub> nanocomposite\*

| Temperature,<br>°C | 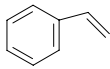 |               |                                  |  |               |                                  |
|--------------------|-------------------------------------------------------------------------------------|---------------|----------------------------------|---------------------------------------------------------------------------------------|---------------|----------------------------------|
|                    | Time, h                                                                             | Conversion, % | Selectivity of alkene epoxide, % | Time, h                                                                               | Conversion, % | Selectivity of alkene epoxide, % |
| 60                 | 2                                                                                   | 51.1          | 28.9                             | 4                                                                                     | 45.2          | 58.6                             |
| 70                 | 2                                                                                   | 88.6          | 61.2                             | 4                                                                                     | 87.7          | 80.9                             |
| 80                 | 2                                                                                   | 98.2          | 56.1                             | 4                                                                                     | 93.4          | 78.3                             |

\*1 mmol alkene, 5 mmol TBHP, and 10 mg catalyst, stirred in 10 mL of acetonitrile under given reaction temperature

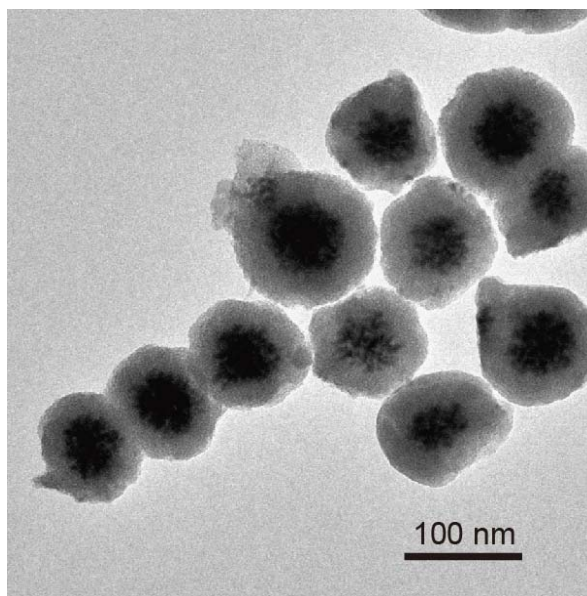

**Fig. S9** TEM image of CuO CNCs@meso-SiO<sub>2</sub> nanocomposite stirred uninterruptedly in the same reaction mixture for 720 h.

**References:**

1. Azhari, S.; Diab, M. *Polymer Degradation and Stability* **1998**, *60*, 253-256.
